# Supplementary material for: Dynamics of the State of Arterial Stiffness as a Possible Pathophysiological Factor of Unfavorable Long-Term Prognosis in Patients after Coronary Artery Bypass Grafting
Source: MDPI journal article supplement (doi:10.3390/biomedicines12051018), 2024-05-06
Supplement: s1 [file s1]

Table S1. The structure of deaths during 10-year follow-up in groups with improved CAVI or with worsened CAVI

|                                     | <b>Group with<br/>improved<br/>CAVI (n=94)</b> | <b>Group with<br/>worsened<br/>CAVI (n=116)</b> | <b>P-value</b> |
|-------------------------------------|------------------------------------------------|-------------------------------------------------|----------------|
| All cause death (n,%)               | 14 (15.8)                                      | 32 (27.6)                                       | 0.029          |
| Death from cardiac causes (n,%)     | 9 (9.6)                                        | 17 (14.7)                                       | 0.266          |
| Death from non-cardiac causes (n,%) | 5 (5.3)                                        | 14 (12.0)                                       | 0.089          |
| Death of malignancies (n,%)         | 2 (2.1)                                        | 9 (7.8)                                         | 0.07           |
| Covid 2019 (n,%)                    | 1 (1.,1)                                       | 3 (2.6)                                         | 0.422          |
| The cause of death is unknown (n,%) | 0 (0)                                          | 1 (0.9)                                         | 0.367          |

Table S2. Comparisons of survival between groups with improved CAVI or with worsened CAVI using Log Rank, Breslow, Tarone-Ware tests

| Overall Comparisons                                                                                                     |            |    |       |
|-------------------------------------------------------------------------------------------------------------------------|------------|----|-------|
|                                                                                                                         | Chi-Square | df | Sig.  |
| Log Rank (Mantel-Cox)                                                                                                   | 2.566      | 1  | 0.109 |
| Breslow (Generalized Wilcoxon)                                                                                          | 3.275      | 1  | 0.070 |
| Tarone-Ware                                                                                                             | 3.047      | 1  | 0.081 |
| Test of equality of survival distributions for the different levels of groups with improved CAVI and with worsened CAVI |            |    |       |

Table S3. Comparisons of event-free survival between groups with improved CAVI or with worsened CAVI using Log Rank, Breslow, Tarone-Ware tests

| Overall Comparisons                                                                                                                |            |    |       |
|------------------------------------------------------------------------------------------------------------------------------------|------------|----|-------|
|                                                                                                                                    | Chi-Square | df | Sig.  |
| Log Rank (Mantel-Cox)                                                                                                              | 4.511      | 1  | 0.034 |
| Breslow (Generalized Wilcoxon)                                                                                                     | 5.571      | 1  | 0.018 |
| Tarone-Ware                                                                                                                        | 5.178      | 1  | 0.023 |
| Test of equality of event-free survival distributions for the different levels of groups with improved CAVI and with worsened CAVI |            |    |       |
